# Supplementary material for: Therapy-induced cholesterol biosynthesis drives lung cancer dormancy and drug resistance
Source: JCI journal article supplement (doi:10.1172/jci191735), 2026-04-15
Supplement: sd2 [file 2]

Gel raw data

Figure 2B

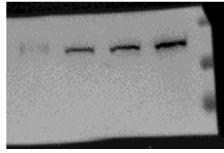

PC9-HMGCR

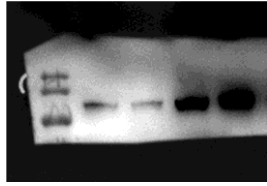

H358-HMGCR

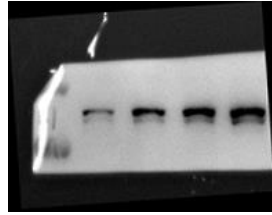

H3122-HMGCR

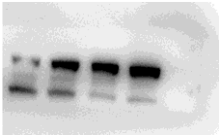

PC9-SQLE

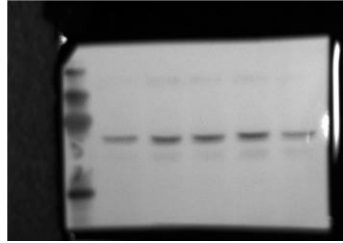

H358-SQLE

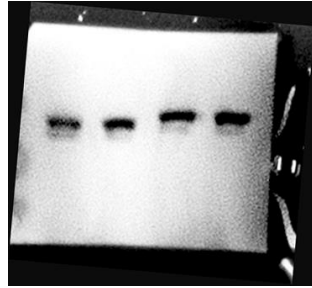

H3122-SQLE

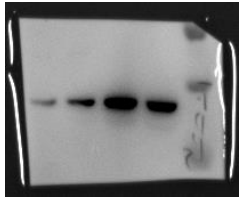

PC9-FDPS

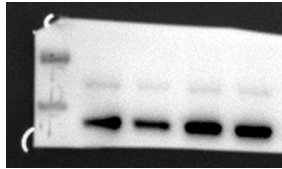

H358-FDPS

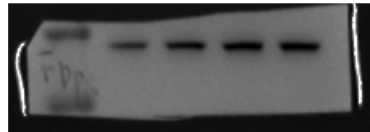

H3122-FDPS

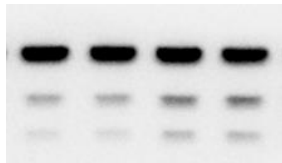

PC9-GAPDH

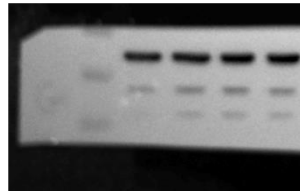

H358-GAPDH

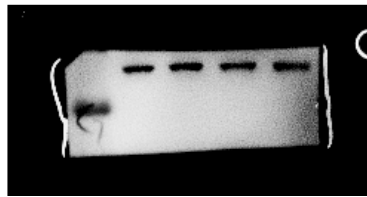

H3122-GAPDH

Figure 3B

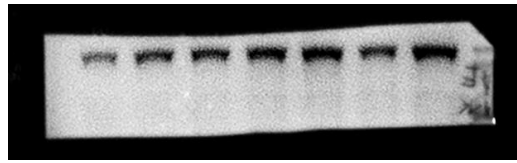

PC9-p-PERK

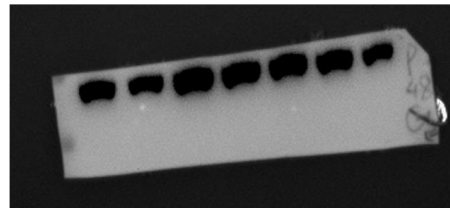

PC9-eIF2a

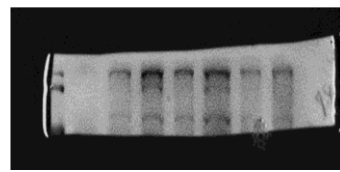

H358-p-PERK

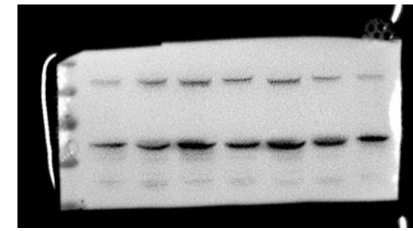

H358-SQLE

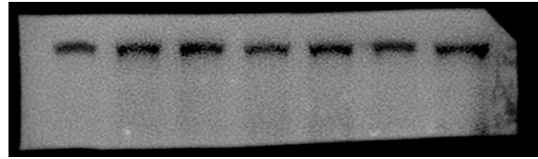

PC9-PERK

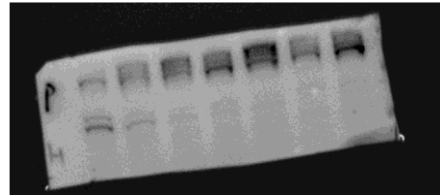

PC9-HMGCR

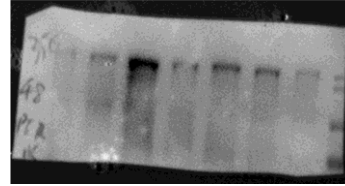

H358-PERK

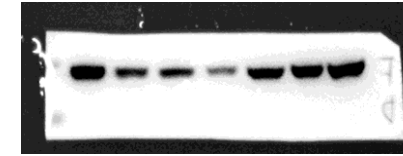

H358-FDPS

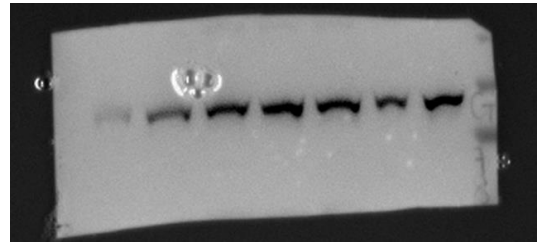

PC9-GRP78

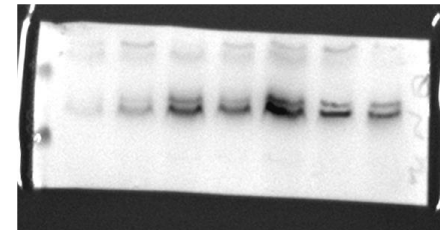

PC9-SQLE

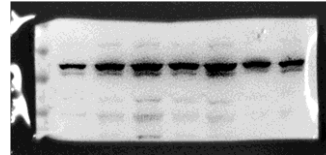

H358-GRP78

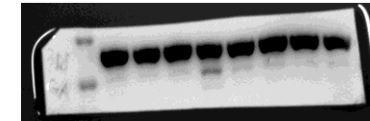

H358-GAPDH

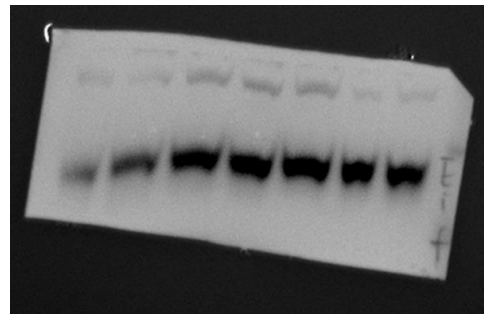

PC9-p-eIF2a

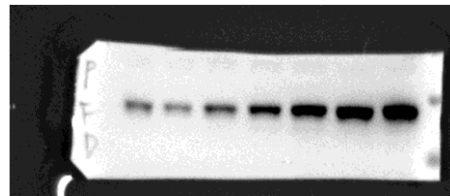

PC9-FDPS

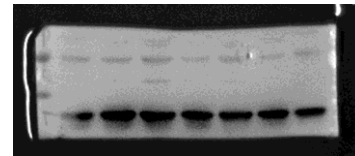

H358-p-EIF2a

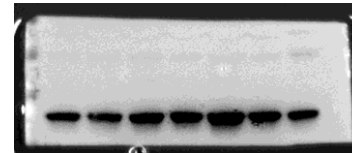

H358-EIF2a

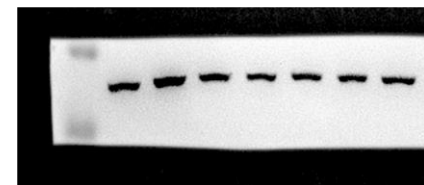

PC9-GAPDH

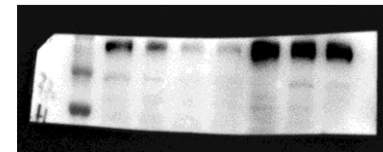

H358-HMGCR

Figure 3B

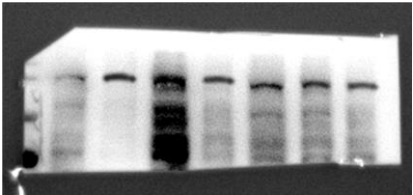

H3122-p-PERK

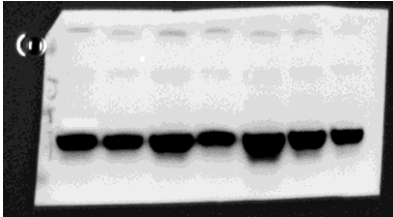

H3122-EIF2a

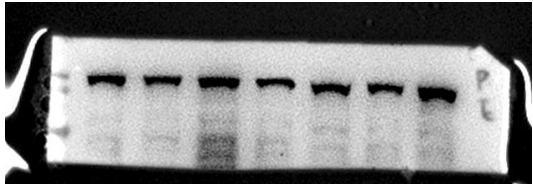

H3122-PERK

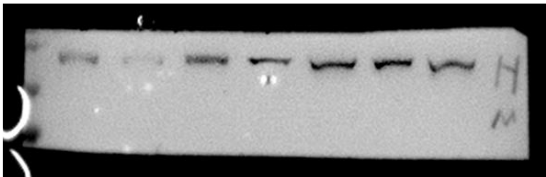

H3122-HMGCR

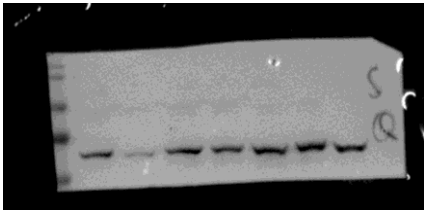

H3122-SQLE

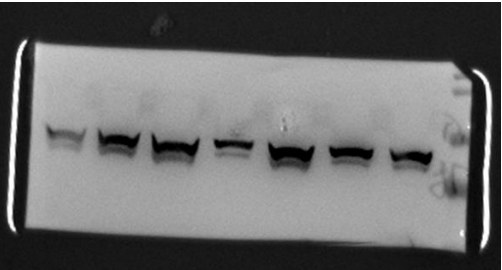

H3122-GRP78

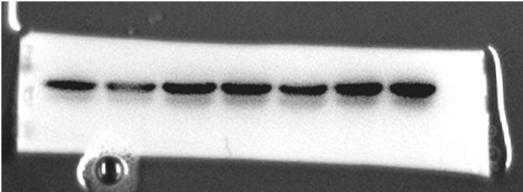

H3122-FDPS

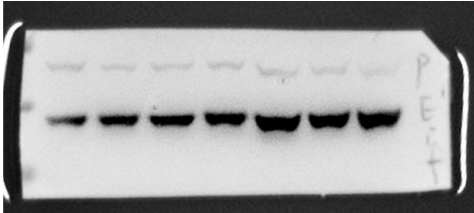

H3122-p-EIF2a

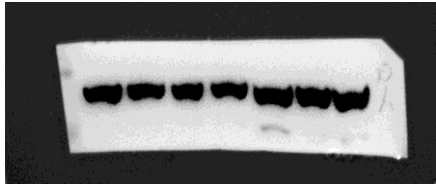

H3122-GAPDH

Figure 3E

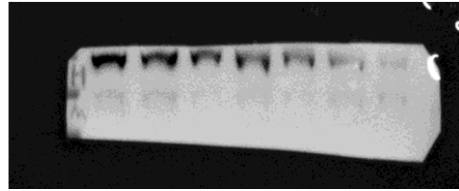

PC9-HMGCR

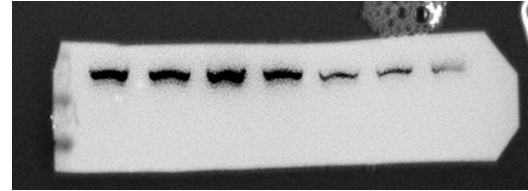

H358-HMGCR

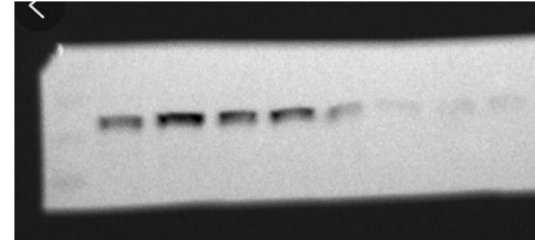

H3122-HMGCR

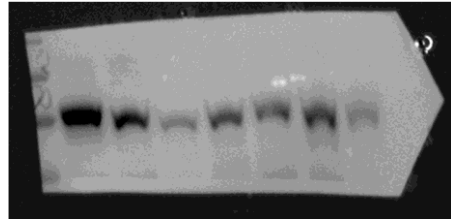

PC9-SQLE

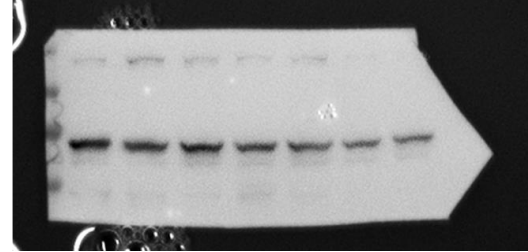

H358-SQLE

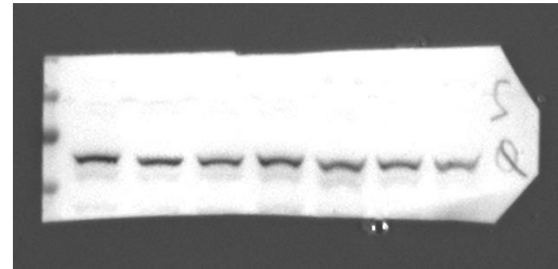

H3122-SQLE

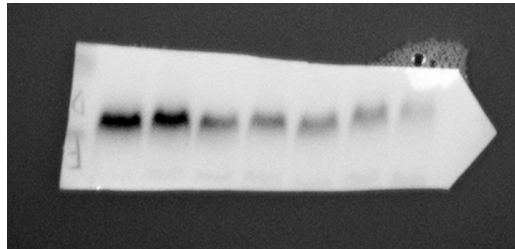

PC9-FDPS

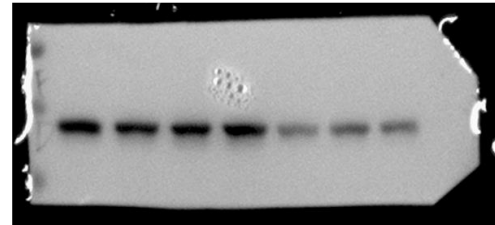

H358-FDPS

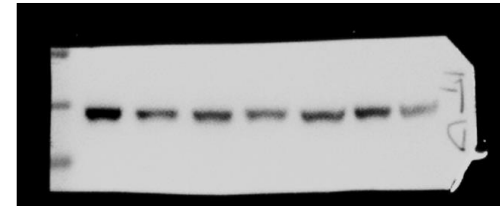

H3122-FDPS

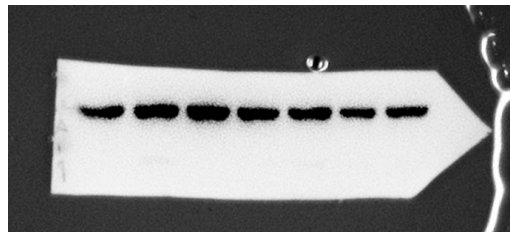

PC9-GAPDH

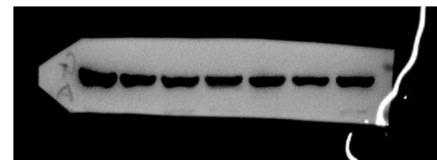

H358-GAPDH

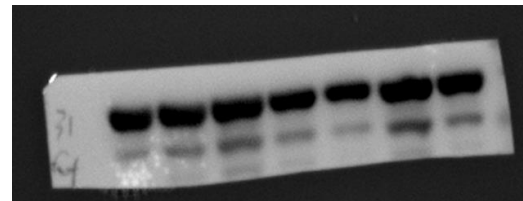

H3122-GAPDH

Figure 4I

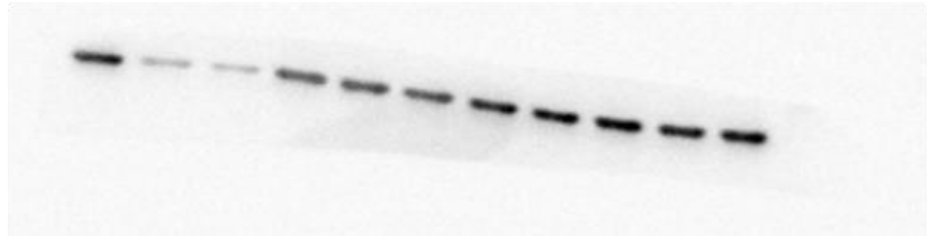

Gef p-AKT (308)

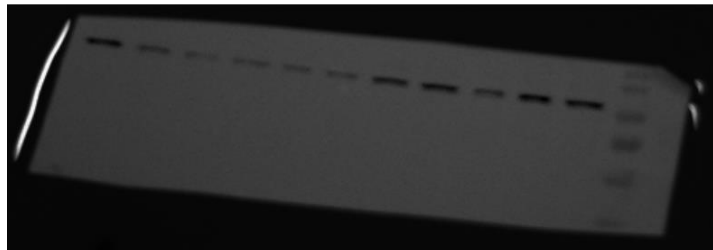

Gef p-AKT (473)

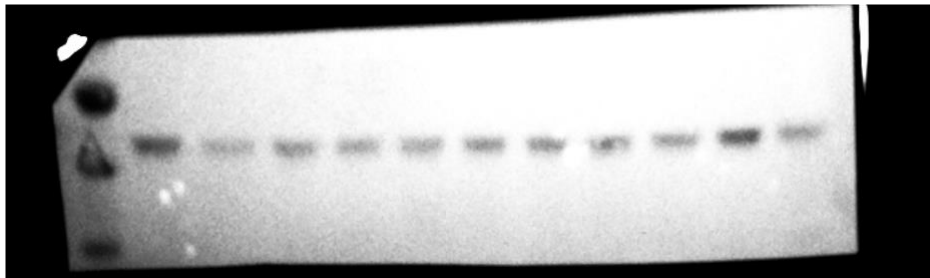

Gef AKT

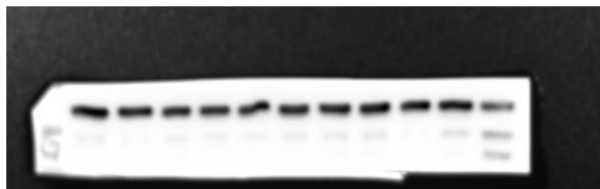

Gef GAPDH

Figure 4J

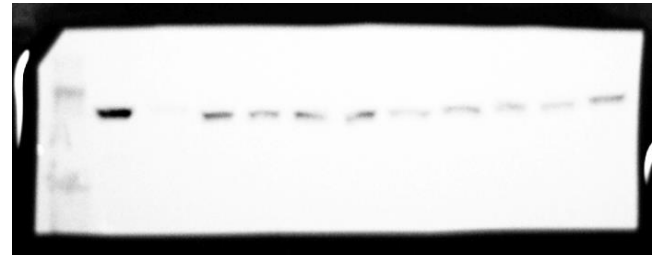

Gef+Lova p-AKT (308)

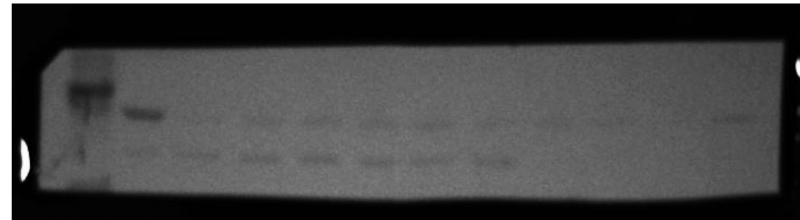

Gef+Lova p-AKT (473)

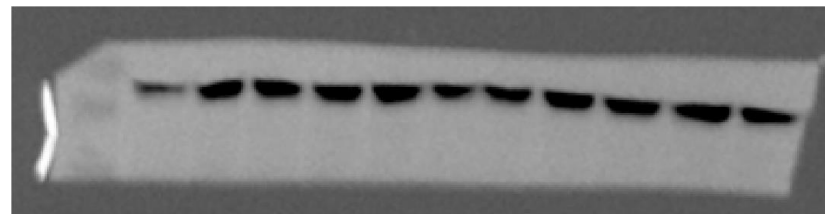

Gef+Lova AKT

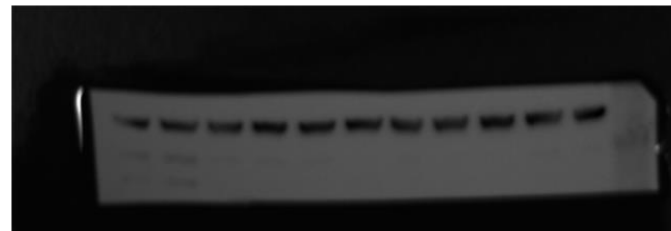

Gef+Lova GAPDH

Figure 4K

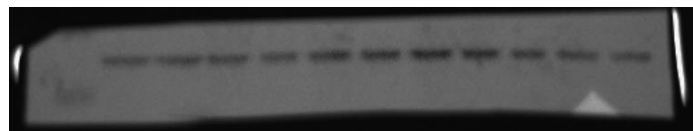

Gef+Lova+SQ p-AKT(308)

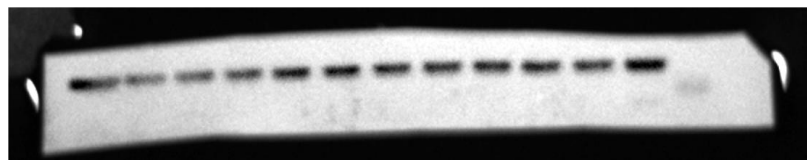

Gef+Lova+SQ p-AKT(473)

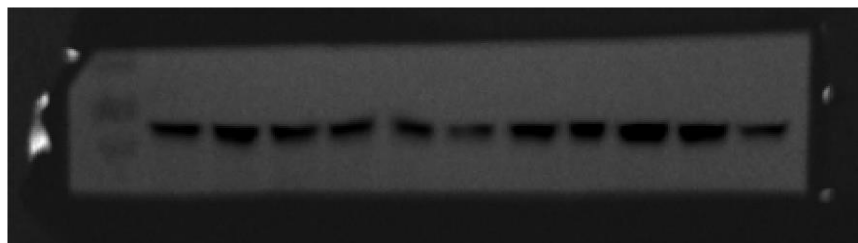

Gef+Lova+SQ AKT

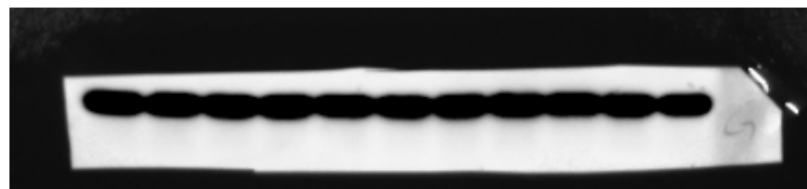

Gef+Lova+SQ GAPDH

Figure 4L

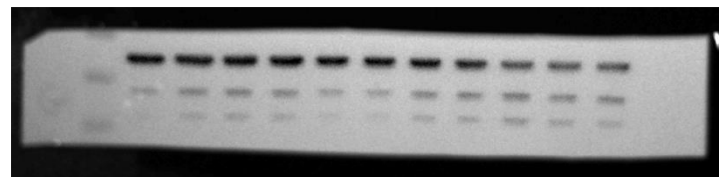

Gef+Lova+chol p-AKT(308)

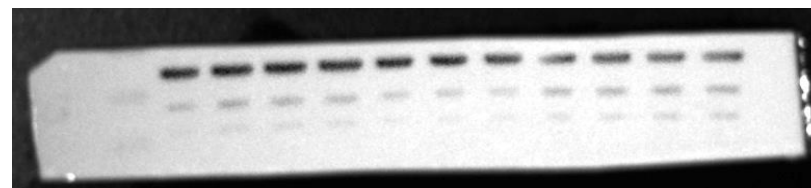

Gef+Lova+chol p-AKT(473)

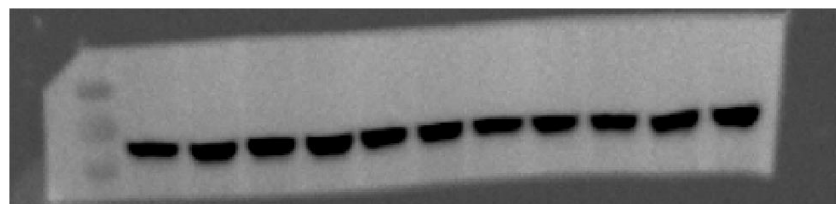

Gef+Lova+chol AKT

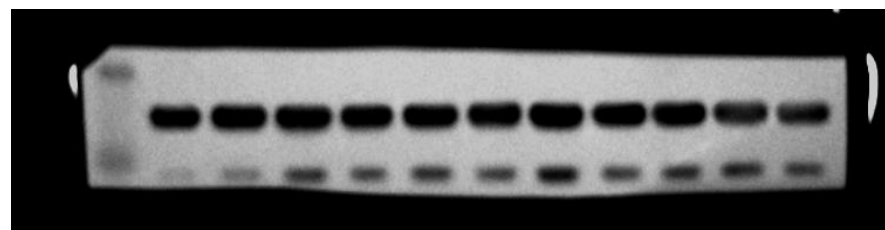

Gef+Lova+chol GAPDH

Figure 5A

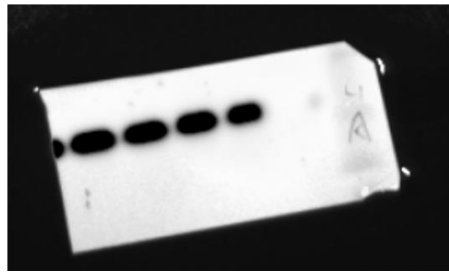

PC9-GAPDH

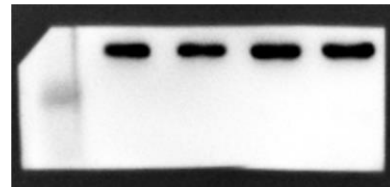

H358-GAPDH

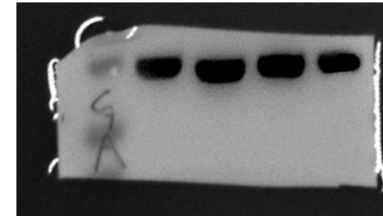

H3122-GAPDH

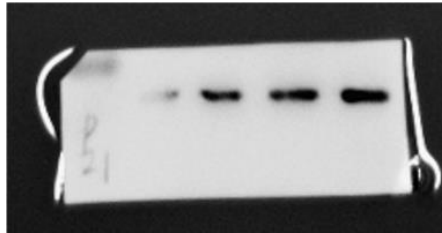

PC9-P21

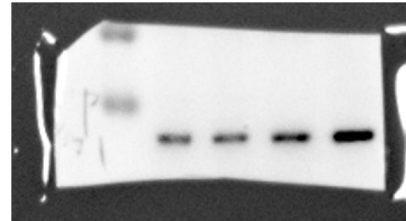

H358-P21

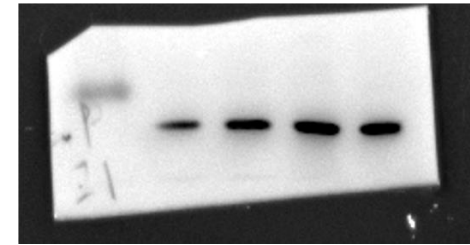

H3122-P21

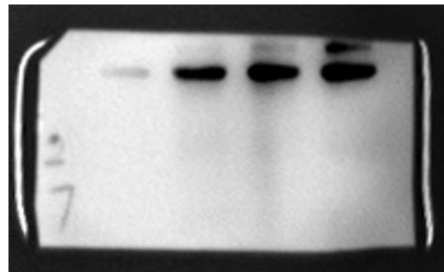

PC9-P27

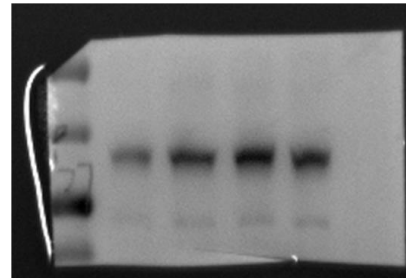

H358-P27

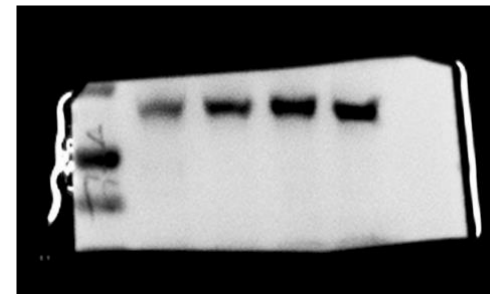

H3122-P27

Figure 6D

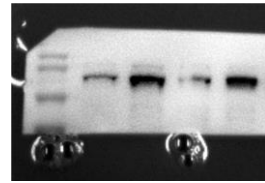

PC9-HMGCR

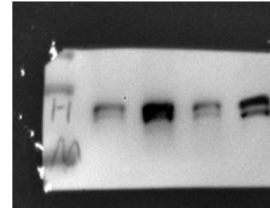

H358-HMGCR

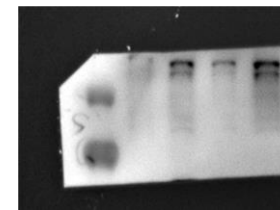

H3122-HMGCR

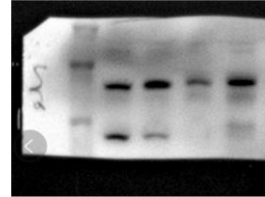

PC9-SQLE

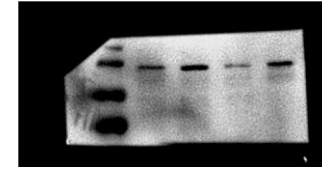

H358-SQLE

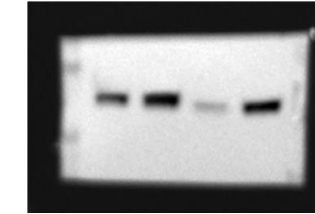

H3122-SQLE

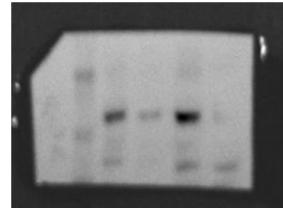

PC9-AuroraA

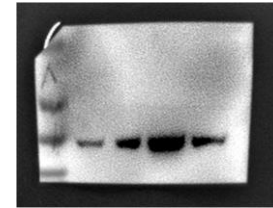

H358-AuroraA

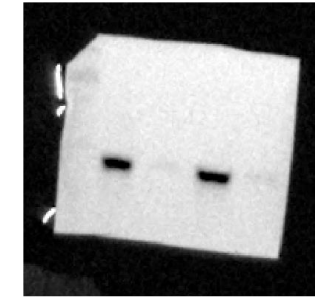

H3122-AuroraA

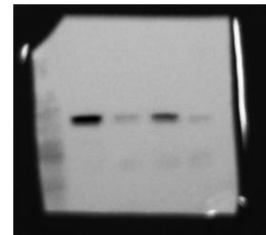

PC9-AuroraB

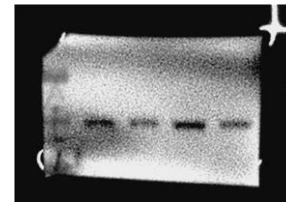

H358-AuroraB

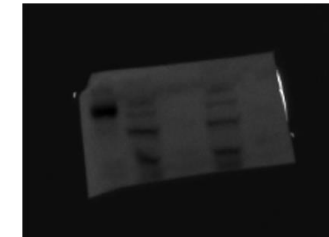

H3122-AuroraB

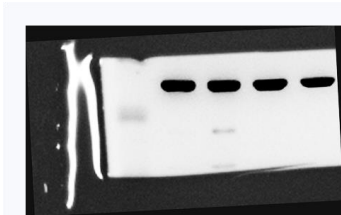

PC9-GAPDH

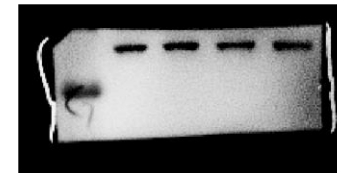

H358-GAPDH

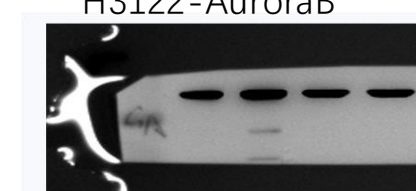

H3122-GAPDH

Supplementary figure 2D

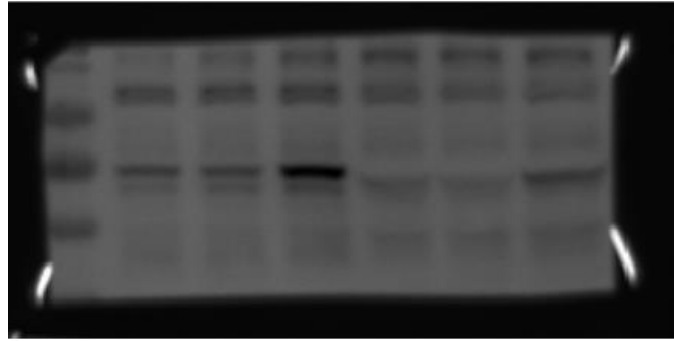

PC9-SREBP2

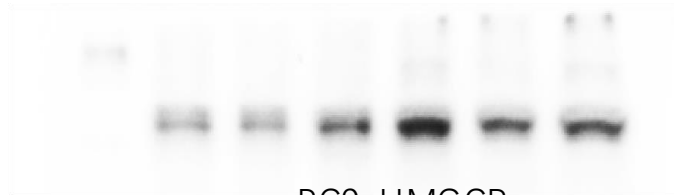

PC9-HMGCR

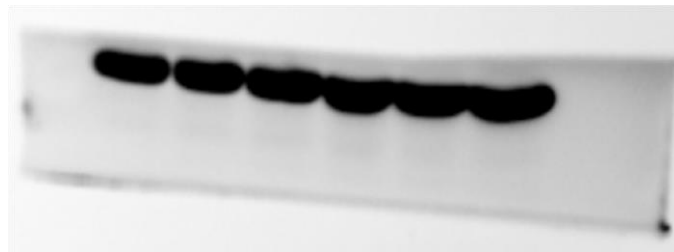

PC9-GAPDH

Supplementary figure 3A

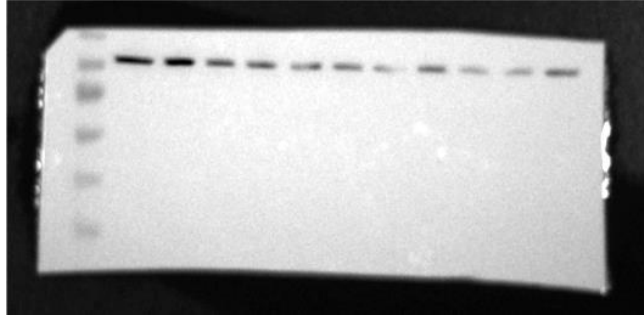

PC9-ATF6

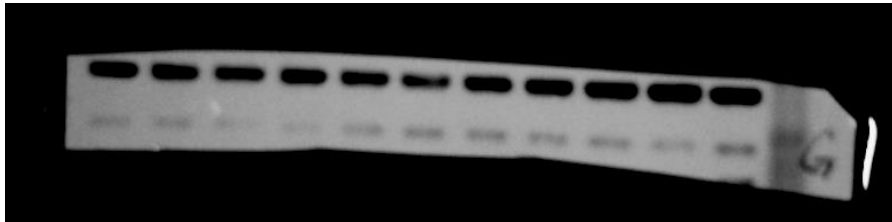

PC9-GAPDH

Supplementary figure 4 A

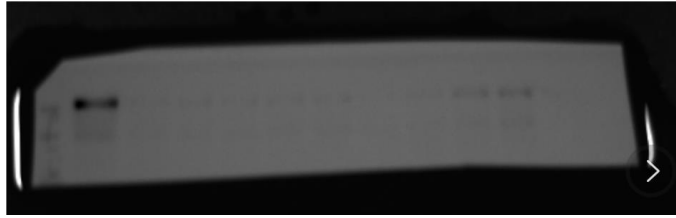

PC9-p-EGFR

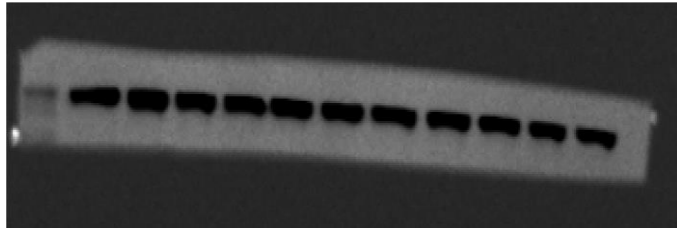

PC9-EGFR

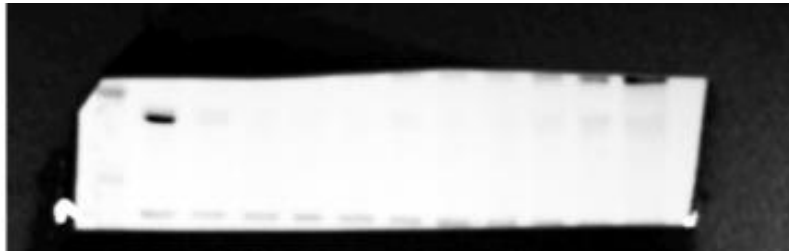

PC9-p-S6

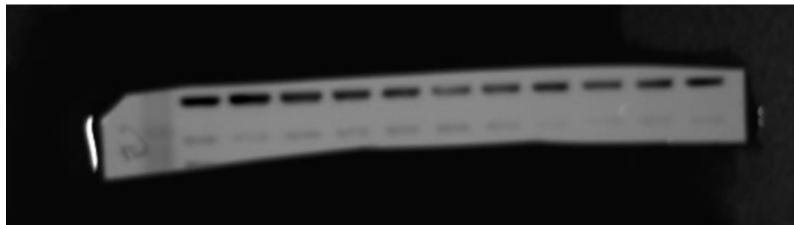

PC9-GAPDH

Supplementary figure 4 G

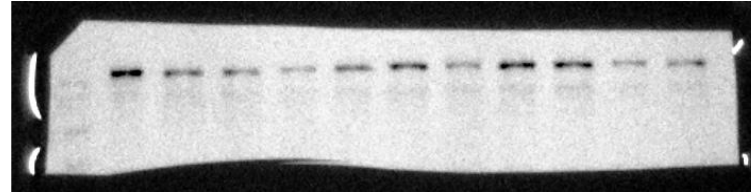

PC9-Ge+SQLE-p-EGFR

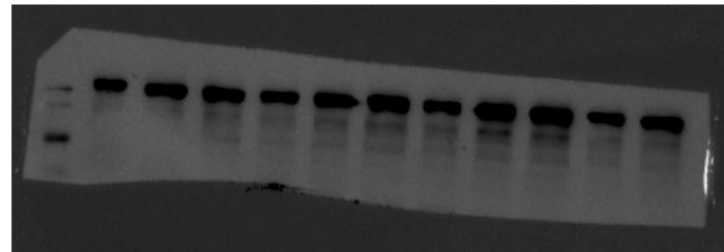

PC9-Ge+SQLE-EGFR

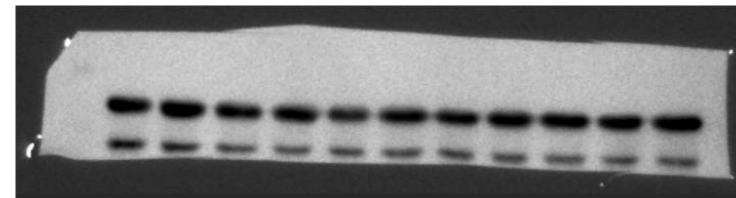

PC9-Ge+SQLE-GAPDH

Supplementary figure 4 I

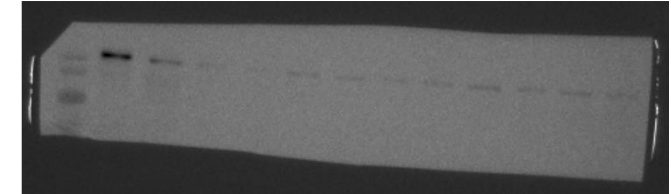

PC9-Ge+Cholesterol-p-EGFR

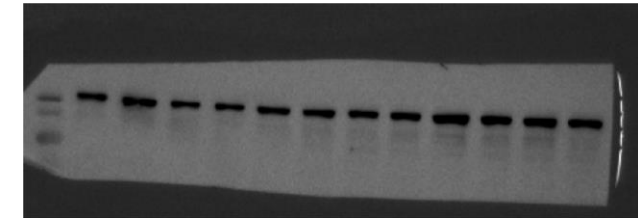

PC9-Ge+Cholesterol-EGFR

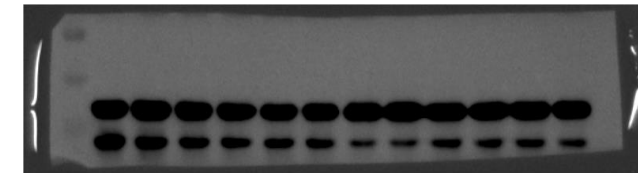

PC9-Ge+Cholesterol-GAPDH
